# Supplementary material for: Fabrication of gold nanocages and nanoshells using lanreotide acetate and a comparison study of their photothermal antitumor therapy
Source: Royal Society of Chemistry journal article supplement (doi:10.1039/c7tb01146f), 2017-01-01
Supplement: c7tb01146f1.pdf [file c7tb01146f1.pdf]

Supporting Information

**Gold Nanocages and Nanoshells Fabrication Using Lanreotide Acetate and Their  
Photothermal Antitumor Therapy Efficacies**

*Weili Xue, Liyao Luo, Yanji Li, Tian Yin, Kexin Bian, Ruiyan Zhu, Dawei Gao\**

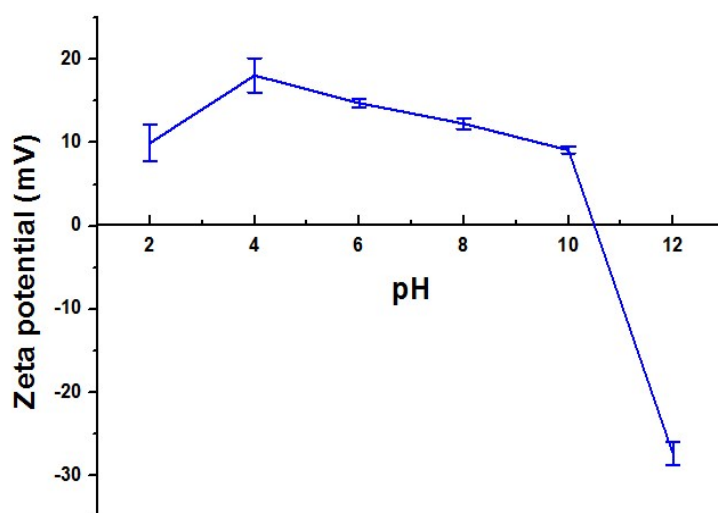

Figure S1. Zeta potentials of lanreotide acetate in hydrochloric acid solution at different pH values

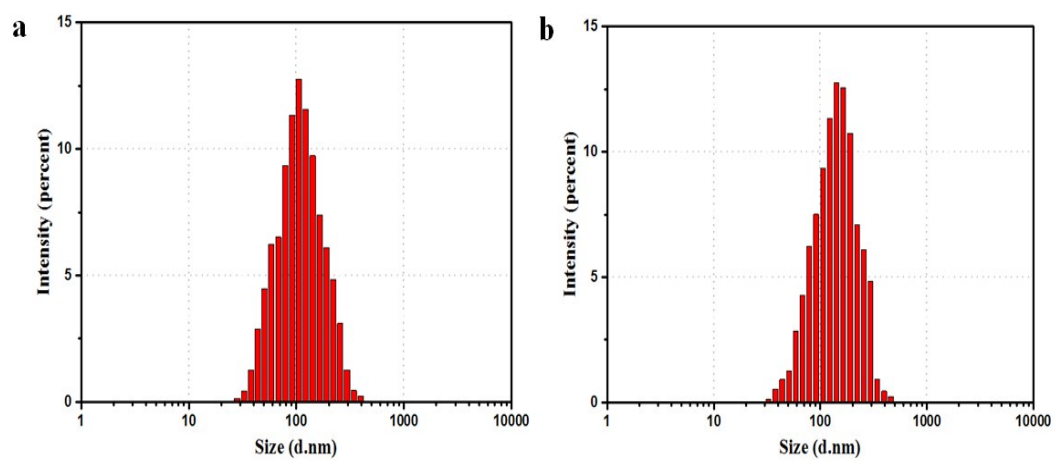

Figure S2. Size distributions of synthesized Lan-AuNSs (a) and Lan-AuNCs (b).

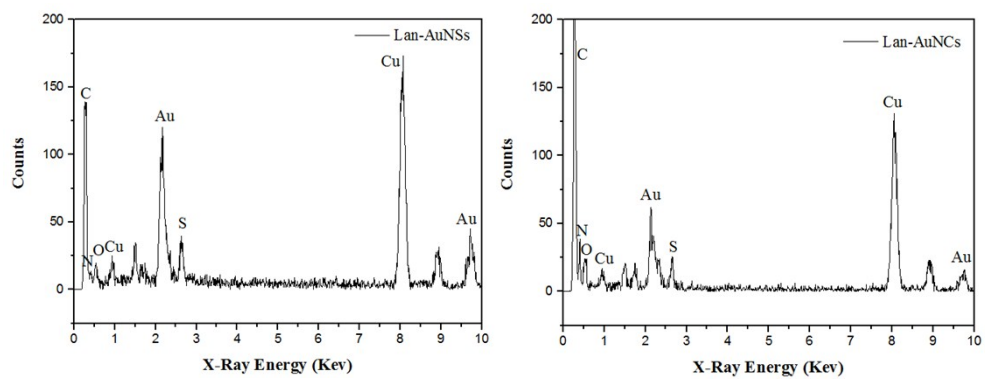

Figure S3. EDS spectra of Lan-AuNSs and Lan-AuNCs

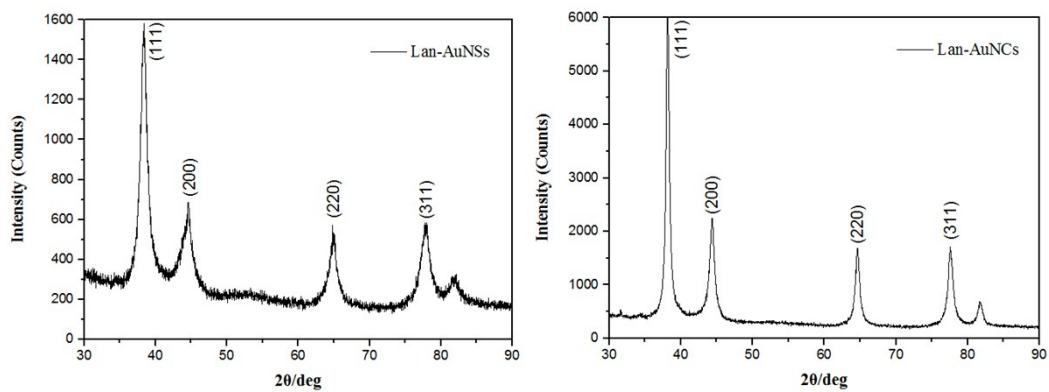

Figure S4. XRD patterns of as-prepared AuNSs and AuNCs

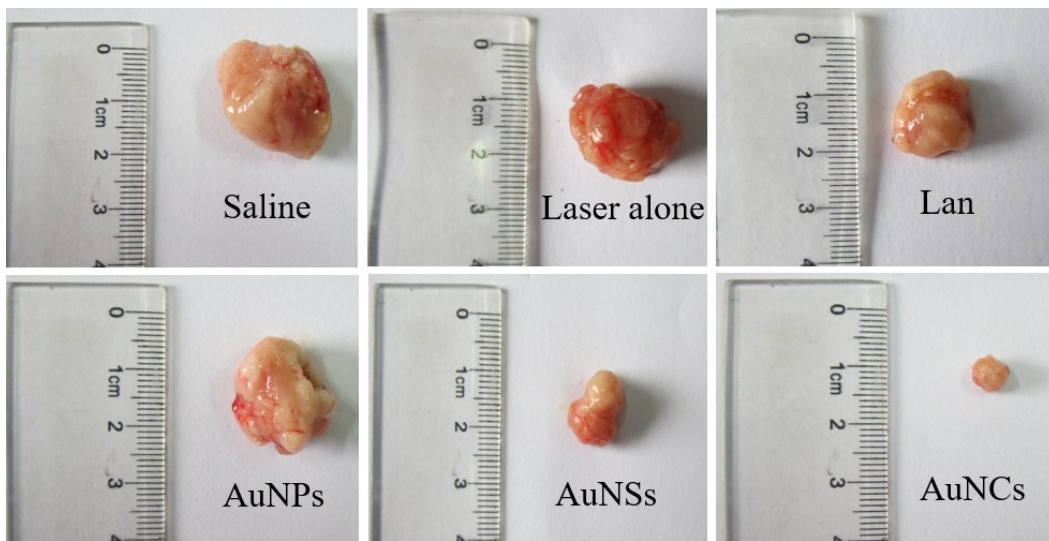

Figure S5. Photographs of the tumors from the mice bearing U14 tumor at the 12th day
